# Supplementary material for: Biodiversity-Centric Habitat Networks for Green Infrastructure Planning: A Case Study in Northern Italy
Source: MDPI journal article supplement (doi:10.3390/su16093604), 2024-04-25
Supplement: s1 [file s1]

## **SUPPLEMENTARY INFORMATION**

### **Biodiversity-centric habitat networks for Green Infrastructure planning: A case study in Northern Italy**

Francesco Lami<sup>1,2</sup>, Francesco Boscutti<sup>1,3</sup>, Elisabetta Peccol<sup>1</sup>, Lucia Piani<sup>1</sup>, Matteo De Luca<sup>4</sup>, Pietro Zandigiacomo<sup>1</sup>, Maurizia Sigura<sup>1\*</sup>

<sup>1</sup>Di4A-Department of Agricultural, Food, Environmental and Animal Sciences, University of Udine, 33100, Udine, Italy.

<sup>2</sup>DISTAL-Department of Agricultural and Food Sciences, University of Bologna, 40127, Bologna, Italy.

<sup>3</sup>NBFC, National Biodiversity Future Center, 90133 Palermo, Italy

<sup>4</sup>For-nature S.r.l, via Ciconi 26, 33100, Udine, Italy

\*Corresponding author: maurizia.sigura@uniud.it

**Running title:** Biodiversity-centric Green Infrastructure

**Keywords:** Ecological networks, Conservation biology, Land management, River ecosystems, Anthropic pressures, Graph theory, Soil impermeabilization

**Table S1.** List of the 23 municipalities included in the study area. All municipalities are either crossed by the rivers or placed in neighboring areas.

| <b>Municipality</b>       | <b>Crossed by Isonzo-Vipacco</b> |
|---------------------------|----------------------------------|
| Campolongo Tapogliano     | No                               |
| Doberdò del Lago          | No                               |
| Farra d'Isonzo            | Yes                              |
| Fiumicello Villavicentina | Yes                              |
| Fogliano Redipuglia       | No                               |
| Gorizia                   | Yes                              |
| Gradisca d'Isonzo         | Yes                              |
| Grado*                    | Yes                              |
| Mariano del Friuli        | No                               |
| Moraro                    | No                               |
| Mossa                     | No                               |
| Romans d'Isonzo           | No                               |
| Ronchi dei Legionari      | No                               |
| Ruda                      | No                               |
| Sagrado                   | Yes                              |
| San Canzian d'Isonzo      | Yes                              |
| San Floriano del Collio   | No                               |
| San Lorenzo Isontino      | No                               |
| San Pier d'Isonzo         | Yes                              |
| Savogna d'Isonzo          | Yes                              |
| Staranzano                | No                               |
| Turriaco                  | Yes                              |
| Villesse                  | Yes                              |

\*A large portion of the Grado municipality is far from the river and we therefore did not consider it as part of its system. Only the section of this municipality that was directly influenced by the river – i.e. the hydraulic/flood risk area surrounding the Isonzo river, as defined in the “Piano stralcio per l’assetto idrogeologico dei bacini dei fiumi Isonzo, Tagliamento, Piave, Brenta-Bacchiglione” ([http://pai.adbve.it/PAI\\_4B\\_2012/idro\\_isonzo.html](http://pai.adbve.it/PAI_4B_2012/idro_isonzo.html)) was included.

**Table S2.** Criteria adopted for the selection of target animal and plant species.

| <b>Plant species</b>                                                                                                                                                                                                                                                                                                    | <b>Animal species</b>                                                                                                                                                                                                                                                                                                                                                                                                                                                                              |
|-------------------------------------------------------------------------------------------------------------------------------------------------------------------------------------------------------------------------------------------------------------------------------------------------------------------------|----------------------------------------------------------------------------------------------------------------------------------------------------------------------------------------------------------------------------------------------------------------------------------------------------------------------------------------------------------------------------------------------------------------------------------------------------------------------------------------------------|
| <ul style="list-style-type: none"><li>a) Included in the list of vascular flora species in Appendix to the Habitat Directive;</li><li>b) Included in national or regional Red Lists;</li><li>c) Rare or endemic species;</li><li>d) Ecological importance;</li><li>e) Specialized for specific habitat types.</li></ul> | <ul style="list-style-type: none"><li>a) Included in the list of species in Appendix to the Habitat Directive;</li><li>b) Included in national or regional Red Lists;</li><li>c) Rarity, endemism, vulnerability;</li><li>d) Knowledge about autoecology and synecology;</li><li>e) Data availability;</li><li>f) Specialized for specific habitat types;</li><li>g) Low mobility and dispersal ability;</li><li>h) Sensitive to habitat fragmentation and at risk of genetic isolation.</li></ul> |

**Table S3.** List of the 17 selected target animal species, with basic information about their biology and conservation status

| <b>Species</b>                  | <b>Group</b>  | <b>Linked with wetlands</b> | <b>Habitats Directive</b> | <b>Fauna of Regional Interest</b> |
|---------------------------------|---------------|-----------------------------|---------------------------|-----------------------------------|
| <i>Bombina variegata</i>        | Vertebrates   | Yes                         | Ann. II, IV               | Yes                               |
| <i>Carabus italicus</i>         | Invertebrates | No                          | No                        | No                                |
| <i>Coenonympha oedippus</i>     | Invertebrates | Yes                         | Ann. II, IV               | No                                |
| <i>Cordulegaster heros</i>      | Invertebrates | Yes                         | Ann. II, IV               | No                                |
| <i>Emys orbicularis</i>         | Vertebrates   | Yes                         | Ann. II, IV               | Yes                               |
| <i>Lacerta viridis</i>          | Vertebrates   | No                          | Ann. IV                   | Yes                               |
| <i>Lucanus cervus</i>           | Invertebrates | No                          | Ann. II                   | Yes                               |
| <i>Lycaena dispar</i>           | Invertebrates | Yes                         | Ann. II, IV               | No                                |
| <i>Maculinea teleius</i>        | Invertebrates | Yes                         | Ann. II, IV               | No                                |
| <i>Muscardinus avellanarius</i> | Vertebrates   | No                          | Ann. IV                   | No                                |
| <i>Natrix tessellata</i>        | Vertebrates   | Yes                         | Ann. IV                   | Yes                               |
| <i>Rana dalmatina</i>           | Vertebrates   | Yes                         | Ann. IV                   | Yes                               |
| <i>Rana latastei</i>            | Vertebrates   | Yes                         | Ann. II, IV               | Yes                               |
| <i>Triturus carnifex</i>        | Vertebrates   | Yes                         | Ann. II, IV               | Yes                               |
| <i>Zamenis longissimus</i>      | Vertebrates   | No                          | Ann. IV                   | Yes                               |
| <i>Zerynthia polyxena</i>       | Invertebrates | Yes                         | Ann. IV                   | No                                |
| <i>Zeuneriana marmorata</i>     | Invertebrates | Yes                         | No                        | Yes                               |

**Table S4.** List of the 13 selected focus habitats for plant species. Some focus habitats include more than one CORINE 2017 habitat category, as detailed in the description.

| Target habitat code | CORINE 2017 code | CORINE 2017 description                                                           |
|---------------------|------------------|-----------------------------------------------------------------------------------|
| AC                  | 22.432           | Rooted communities of shallow waters with depth variations                        |
| AC                  | 22.42            | Rooted submerged vegetation                                                       |
| AC                  | 24.4             | Submerged river vegetation                                                        |
| AC                  | 24.13            | Grayling zone                                                                     |
| AC                  | 24.42            | Lime-rich oligotrophic river vegetation                                           |
| BL13                | 41.2A2           | Sub-hygrophilous oak-hornbeam forests of illyrian plains                          |
| BU10                | 44.911           | Meso-eutrophic swamp alder woods                                                  |
| BU5                 | 44.614           | Italian poplar riparian galleries                                                 |
| BU5                 | 44.13            | White willow gallery forests                                                      |
| BU                  | 44.431           | Illyrian ash-oak-alder flooded forests                                            |
| BU                  | 44.44            | Oak-ash-alder forests of Po fluvial terraces                                      |
| CA                  | 15.21            | Flooded codgrass swards                                                           |
| CA                  | 15.113           | Mediterranean glasswort swards                                                    |
| CA                  | 15.51            | Mediterranean tall rush saltmarshes                                               |
| CA                  | 15.55            | Mediterranean saltmarsh grass swards                                              |
| CA                  | 15.57            | Saltmarsh couch-wormwood stands                                                   |
| CA                  | 15.612           | Shrubby glasswort thickets                                                        |
| CP5                 | 16.22            | Grey dunes                                                                        |
| PC pio              | 34.11            | Middle European rock debris swards                                                |
| PC pio              | 62.311           | Limestone pavements                                                               |
| PC10                | 34.753b          | Xero-mesophilous sub-mediterranean dry grasslands of lowland and pre-alpine areas |
| PC4                 | 34.752a          | Karstic xerophilous sub-mediterranean dry grasslands                              |
| PC9                 | 34.753a          | Karstic xero-mesophilous sub-mediterranean dry grasslands                         |
| PM1                 | 38.2             | Lowland hay meadows                                                               |
| PU                  | 37.1             | Meadowsweet stands and related communities                                        |
| PU                  | 37.31            | Purple moorgrass meadows and related communities                                  |

**Table S5.** Soil sealing of nodes, corridors and stepping stones of the ecological network, expressed as total area (ha), % of occupied area in each municipality and % of the total sealed surface in the entire study area.

| Municipality               | Nodes        |            |                | Corridors    |             |                | Stepping stones |            |                |
|----------------------------|--------------|------------|----------------|--------------|-------------|----------------|-----------------|------------|----------------|
|                            | Area (ha)    | %          | % of the total | Area (ha)    | %           | % of the total | Area (ha)       | %          | % of the total |
| CAMPOLONGO                 | 10.0         | 10.7       | 1.7            | 8.5          | 14.0        | 1.1            | 0.5             | 6.5        | 0.5            |
| TAOGLIANO                  |              |            |                |              |             |                |                 |            |                |
| DOBERDO' DEL LAGO          | 127.2        | 5.3        | 21.6           | 0.3          | 16.6        | 0.0            | 2.9             | 12.9       | 2.9            |
| FARRA D'ISONZO             | 5.5          | 3.9        | 0.9            | 16.2         | 13.8        | 2.0            | 2.3             | 9.4        | 2.3            |
| FIUMICELLO VILLA VICENTINA | 12.3         | 9.1        | 2.1            | 77.8         | 17.7        | 9.7            | 1.1             | 11.2       | 1.1            |
| FOGLIANO REDIPUGLIA        | 16.9         | 5.7        | 2.9            | 13.1         | 22.3        | 1.6            | 3.7             | 16.8       | 3.7            |
| GORIZIA                    | 55.9         | 5.5        | 9.5            | 155.8        | 26.4        | 19.5           | 19.5            | 7.8        | 19.7           |
| GRADISCA D'ISONZO          | 10.4         | 6.1        | 1.8            | 76.6         | 29.1        | 9.6            | 1.5             | 10.8       | 1.5            |
| GRADO                      | 10.2         | 3.2        | 1.7            | 19.3         | 7.6         | 2.4            | 0.6             | 3.1        | 0.6            |
| MARIANO DEL FRIULI         | 7.0          | 8.7        | 1.2            | 32.0         | 19.8        | 4.0            | 0.2             | 7.2        | 0.2            |
| MORARO                     | 1.1          | 5.5        | 0.2            | 23.0         | 14.2        | 2.9            | 1.0             | 6.6        | 1.0            |
| MOSSA                      | 5.1          | 5.2        | 0.9            | 23.0         | 13.1        | 2.9            | 3.0             | 6.8        | 3.1            |
| ROMANS D'ISONZO            | 26.1         | 12.0       | 4.4            | 41.4         | 22.1        | 5.2            | 8.6             | 8.3        | 8.6            |
| RONCHI DEI LEGIONARI       | 60.2         | 7.8        | 10.2           | 66.9         | 33.6        | 8.4            | 17.2            | 29.0       | 17.3           |
| RUDA                       | 10.1         | 5.5        | 1.7            | 41.8         | 14.8        | 5.2            | 2.9             | 6.8        | 2.9            |
| SAGRADO                    | 56.1         | 5.8        | 9.5            | 2.2          | 13.6        | 0.3            | 0.8             | 4.8        | 0.8            |
| SAN CANZIAN D'ISONZO       | 20.3         | 5.5        | 3.5            | 42.0         | 10.0        | 5.3            | 9.2             | 7.5        | 9.3            |
| SAN FLORIANO DEL COLLIO    | 9.6          | 7.3        | 1.6            | 11.3         | 9.6         | 1.4            | 4.9             | 4.3        | 5.0            |
| SAN LORENZO ISONTINO       | 3.7          | 15.2       | 0.6            | 26.8         | 16.8        | 3.4            | 1.3             | 5.7        | 1.3            |
| SAN PIER D'ISONZO          | 16.6         | 8.5        | 2.8            | 10.4         | 12.0        | 1.3            | 2.3             | 10.1       | 2.3            |
| SAVOGNA D'ISONZO           | 66.3         | 6.0        | 11.3           | 6.0          | 14.5        | 0.7            | 0.2             | 10.6       | 0.2            |
| STARANZANO                 | 6.1          | 1.7        | 1.0            | 63.9         | 23.4        | 8.0            | 4.2             | 3.4        | 4.2            |
| TURRIACO                   | 13.3         | 7.9        | 2.3            | 4.4          | 20.8        | 0.5            | 1.7             | 6.5        | 1.7            |
| VILLESSE                   | 38.1         | 10.6       | 6.5            | 36.5         | 40.3        | 4.6            | 10.0            | 19.2       | 10.1           |
| <b>ENTIRE STUDY AREA</b>   | <b>588.2</b> | <b>6.1</b> | <b>100.0</b>   | <b>799.0</b> | <b>19.1</b> | <b>100.0</b>   | <b>99.4</b>     | <b>8.7</b> | <b>100.0</b>   |

**Table S6.** Anthropic impacts of intensive agriculture, intensive agriculture with seminatural residuals, perennial crops and alien vegetation on corridors of the ecological network, expressed as total area (ha), % of occupied area in each municipality and % of the total impact in the entire study area.

| Municipality             | Intensive agriculture |      |                | Intensive agriculture with seminatural residuals |      |                | Perennial crops |      |                | Alien vegetation |      |                |
|--------------------------|-----------------------|------|----------------|--------------------------------------------------|------|----------------|-----------------|------|----------------|------------------|------|----------------|
|                          | Area (ha)             | %    | % of the total | Area (ha)                                        | %    | % of the total | Area (ha)       | %    | % of the total | Area (ha)        | %    | % of the total |
| CAMPOLONGO               | 43.9                  | 72.7 | 3.3            | 0.0                                              | 0.0  | 0.0            | 4.6             | 7.6  | 0.7            | 1.1              | 1.7  | 0.4            |
| TAPOGLIANO               |                       |      |                |                                                  |      |                |                 |      |                |                  |      |                |
| DOBERDO' DEL LAGO        | 0.0                   | 0.0  | 0.0            | 0.0                                              | 0.0  | 0.0            | 0.0             | 0.0  | 0.0            | 1.5              | 83.9 | 0.5            |
| FARRA D'ISONZO           | 14.1                  | 12.1 | 1.0            | 17.7                                             | 15.2 | 3.8            | 47.0            | 40.2 | 7.5            | 16.4             | 14.1 | 5.9            |
| FIUMICELLO               |                       |      |                |                                                  |      |                |                 |      |                |                  |      |                |
| VILLA VICENTINA          | 236.8                 | 53.9 | 17.5           | 16.2                                             | 3.7  | 3.5            | 71.2            | 16.2 | 11.4           | 0.9              | 0.2  | 0.3            |
| FOGLIANO                 |                       |      |                |                                                  |      |                |                 |      |                |                  |      |                |
| REDIPUGLIA               | 18.8                  | 32.0 | 1.4            | 0.9                                              | 1.5  | 0.2            | 9.9             | 16.8 | 1.6            | 6.7              | 11.3 | 2.4            |
| GORIZIA                  | 8.0                   | 1.4  | 0.6            | 124.8                                            | 21.2 | 27.0           | 92.3            | 15.6 | 14.7           | 93.7             | 15.9 | 33.4           |
| GRADISCA                 |                       |      |                |                                                  |      |                |                 |      |                |                  |      |                |
| D'ISONZO                 | 90.7                  | 34.4 | 6.7            | 6.5                                              | 2.5  | 1.4            | 22.3            | 8.5  | 3.6            | 10.3             | 3.9  | 3.7            |
| GRADO                    | 175.7                 | 69.1 | 13.0           | 0.0                                              | 0.0  | 0.0            | 26.6            | 10.5 | 4.2            | 4.3              | 1.7  | 1.5            |
| MARIANO DEL FRIULI       | 41.0                  | 25.4 | 3.0            | 20.7                                             | 12.8 | 4.5            | 46.4            | 28.7 | 7.4            | 9.5              | 5.9  | 3.4            |
| MORARO                   | 25.4                  | 15.7 | 1.9            | 48.3                                             | 29.9 | 10.5           | 47.7            | 29.4 | 7.6            | 5.6              | 3.5  | 2.0            |
| MOSSA                    | 21.7                  | 12.3 | 1.6            | 34.1                                             | 19.4 | 7.4            | 31.5            | 17.9 | 5.0            | 12.7             | 7.2  | 4.5            |
| ROMANS                   |                       |      |                |                                                  |      |                |                 |      |                |                  |      |                |
| D'ISONZO                 | 67.1                  | 35.9 | 5.0            | 33.5                                             | 17.9 | 7.3            | 18.2            | 9.7  | 2.9            | 8.7              | 4.7  | 3.1            |
| RONCHI DEI LEGIONARI     | 27.2                  | 13.7 | 2.0            | 33.3                                             | 16.7 | 7.2            | 12.0            | 6.0  | 1.9            | 14.1             | 7.1  | 5.0            |
| RUDA                     | 173.9                 | 61.7 | 12.9           | 7.2                                              | 2.5  | 1.6            | 38.5            | 13.6 | 6.1            | 4.4              | 1.6  | 1.6            |
| SAGRADO                  | 0.0                   | 0.0  | 0.0            | 0.1                                              | 0.4  | 0.0            | 0.0             | 0.1  | 0.0            | 0.4              | 2.6  | 0.2            |
| S. CANZIAN               |                       |      |                |                                                  |      |                |                 |      |                |                  |      |                |
| D'ISONZO                 | 235.9                 | 56.2 | 17.5           | 33.8                                             | 8.0  | 7.3            | 40.0            | 9.5  | 6.4            | 9.3              | 2.2  | 3.3            |
| S. FLORIANO DEL COLLIO   | 3.8                   | 3.3  | 0.3            | 11.2                                             | 9.5  | 2.4            | 56.4            | 48.1 | 9.0            | 16.2             | 13.8 | 5.8            |
| S. LORENZO               |                       |      |                |                                                  |      |                |                 |      |                |                  |      |                |
| ISONTINO                 | 3.7                   | 2.3  | 0.3            | 35.2                                             | 22.0 | 7.6            | 14.5            | 9.1  | 2.3            | 41.9             | 26.2 | 15.0           |
| S. PIER D'ISONZO         | 19.6                  | 22.8 | 1.5            | 15.3                                             | 17.8 | 3.3            | 27.0            | 31.4 | 4.3            | 3.5              | 4.0  | 1.2            |
| SAVOGNA                  |                       |      |                |                                                  |      |                |                 |      |                |                  |      |                |
| D'ISONZO                 | 0.0                   | 0.0  | 0.0            | 0.0                                              | 0.0  | 0.0            | 0.0             | 0.0  | 0.0            | 12.3             | 30.0 | 4.4            |
| STARANZANO               | 106.5                 | 38.9 | 7.9            | 8.8                                              | 3.2  | 1.9            | 18.7            | 6.8  | 3.0            | 4.3              | 1.6  | 1.5            |
| TURRIACO                 | 8.2                   | 39.3 | 0.6            | 2.1                                              | 10.1 | 0.5            | 0.0             | 0.0  | 0.0            | 0.8              | 3.8  | 0.3            |
| VILLESSE                 | 28.7                  | 31.6 | 2.1            | 11.9                                             | 13.1 | 2.6            | 2.0             | 2.2  | 0.3            | 1.9              | 2.0  | 0.7            |
| <b>ENTIRE STUDY AREA</b> | 1350.9                | 32.3 | 100.0          | 461.5                                            | 11.0 | 100.0          | 626.6           | 15.0 | 100.0          | 280.2            | 6.7  | 100.0          |

**Table S7.** Roads, highways and railways in the nodes, corridors and stepping stones of the ecological network, expressed as total length (m), density (m/ha) and % of the total length in the entire study area.

| Municipality             | Nodes         |                   |                   | Corridors     |                   |                   | Stepping stones |                   |                   |
|--------------------------|---------------|-------------------|-------------------|---------------|-------------------|-------------------|-----------------|-------------------|-------------------|
|                          | Length<br>(m) | Density<br>(m/ha) | %<br>of the total | Length<br>(m) | Density<br>(m/ha) | %<br>of the total | Length<br>(m)   | Density<br>(m/ha) | %<br>of the total |
| CAMPOLONGO               | 567.2         | 6.0               | 1.3               | 204.3         | 3.4               | 0.3               | 0.0             | 0.0               | 0.0               |
| TAPOGLIANO               |               |                   |                   |               |                   |                   |                 |                   |                   |
| DOBERDO' DEL LAGO        | 14420.6       | 6.0               | 33.6              | 89.3          | 51.0              | 0.1               | 40.4            | 1.8               | 0.7               |
| FARRA D'ISONZO           | 173.1         | 1.2               | 0.4               | 1477.6        | 12.7              | 2.4               | 25.1            | 1.0               | 0.4               |
| FIUMICELLO VILLA         | 2501.8        | 18.4              | 5.8               | 7700.0        | 17.5              | 12.8              | 160.2           | 16.8              | 2.6               |
| VICENTINA                |               |                   |                   |               |                   |                   |                 |                   |                   |
| FOGLIANO                 | 1172.2        | 3.9               | 2.7               | 600.0         | 10.2              | 1.0               | 292.4           | 13.4              | 4.8               |
| REDIPUGLIA               |               |                   |                   |               |                   |                   |                 |                   |                   |
| GORIZIA                  | 5289.0        | 5.2               | 12.3              | 7268.8        | 12.3              | 12.0              | 557.5           | 2.2               | 9.2               |
| GRADISCA D'ISONZO        | 281.1         | 1.6               | 0.7               | 6217.1        | 23.6              | 10.3              | 156.7           | 11.3              | 2.6               |
| GRADO                    | 42.2          | 0.1               | 0.1               | 496.4         | 2.0               | 0.8               | 128.0           | 6.5               | 2.1               |
| MARIANO DEL FRIULI       | 188.3         | 2.3               | 0.4               | 1397.5        | 8.7               | 2.3               | 0.0             | 0.0               | 0.0               |
| MORARO                   | 0.0           | 0.0               | 0.0               | 2832.1        | 17.5              | 4.7               | 201.3           | 13.5              | 3.3               |
| MOSSA                    | 312.5         | 3.1               | 0.7               | 1693.3        | 9.6               | 2.8               | 0.0             | 0.0               | 0.0               |
| ROMANS D'ISONZO          | 624.5         | 2.9               | 1.5               | 2454.6        | 13.1              | 4.1               | 833.3           | 8.1               | 13.7              |
| RONCHI DEI               | 3546.9        | 4.6               | 8.3               | 7806.7        | 39.2              | 12.9              | 919.1           | 15.5              | 15.1              |
| LEGIONARI                |               |                   |                   |               |                   |                   |                 |                   |                   |
| RUDA                     | 115.4         | 0.6               | 0.3               | 2808.9        | 10.0              | 4.7               | 0.0             | 0.0               | 0.0               |
| SAGRADO                  | 6344.3        | 6.6               | 14.8              | 0.0           | 0.0               | 0.0               | 0.0             | 0.0               | 0.0               |
| S. CANZIAN D'ISONZO      | 918.8         | 2.5               | 2.1               | 4798.0        | 11.4              | 7.9               | 1432.0          | 11.7              | 23.5              |
| S. FLORIANO DEL          | 260.5         | 2.0               | 0.6               | 0.0           | 0.0               | 0.0               | 126.5           | 1.1               | 2.1               |
| COLLIO                   |               |                   |                   |               |                   |                   |                 |                   |                   |
| S. LORENZO ISONTINO      | 0.0           | 0.0               | 0.0               | 2152.4        | 13.5              | 3.6               | 478.1           | 20.5              | 7.9               |
| S. PIER D'ISONZO         | 194.7         | 1.0               | 0.5               | 1202.1        | 14.0              | 2.0               | 0.0             | 0.0               | 0.0               |
| SAVOGNA D'ISONZO         | 3849.7        | 3.5               | 9.0               | 1684.9        | 41.1              | 2.8               | 0.0             | 0.0               | 0.0               |
| STARANZANO               | 0.0           | 0.0               | 0.0               | 4125.4        | 15.1              | 6.8               | 204.4           | 1.6               | 3.4               |
| TURRIACO                 | 697.2         | 4.1               | 1.6               | 124.2         | 5.9               | 0.2               | 307.0           | 11.6              | 5.0               |
| VILLESSE                 | 1435.7        | 4.0               | 3.3               | 3255.5        | 35.9              | 5.4               | 218.7           | 4.2               | 3.6               |
| <b>ENTIRE STUDY AREA</b> | 42935.3       | 4.5               | 100.0             | 60389.1       | 14.5              | 100.0             | 6080.8          | 5.3               | 100.0             |



**Table S8.** Linear barriers linked with aquatic habitats (i.e. dams and weirs) in the nodes of the ecological network, expressed as total length (m), density (m/ha) and % of the total length in the entire study area.

| <b>Municipality</b>        | <b>Length (m)</b> | <b>Density (m/ha)</b> | <b>% of the total</b> |
|----------------------------|-------------------|-----------------------|-----------------------|
| CAMPOLONGO TAPOGLIANO      | 0.0               | 0.0                   | 0.0                   |
| DOBERDO' DEL LAGO          | 0.0               | 0.0                   | 0.0                   |
| FARRA D'ISONZO             | 216.0             | 1.5                   | 11.4                  |
| FIUMICELLO VILLA VICENTINA | 0.0               | 0.0                   | 0.0                   |
| FOGLIANO REDIPUGLIA        | 0.0               | 0.0                   | 0.0                   |
| GORIZIA                    | 615.4             | 0.6                   | 32.4                  |
| GRADISCA D'ISONZO          | 285.9             | 1.7                   | 15.1                  |
| GRADO                      | 0.0               | 0.0                   | 0.0                   |
| MARIANO DEL FRIULI         | 63.2              | 0.8                   | 3.3                   |
| MORARO                     | 51.9              | 2.5                   | 2.7                   |
| MOSSA                      | 17.6              | 0.2                   | 0.9                   |
| ROMANS D'ISONZO            | 28.1              | 0.1                   | 1.5                   |
| RONCHI DEI LEGIONARI       | 0.0               | 0.0                   | 0.0                   |
| RUDA                       | 0.0               | 0.0                   | 0.0                   |
| SAGRADO                    | 322.9             | 0.3                   | 17.0                  |
| SAN CANZIAN D'ISONZO       | 0.0               | 0.0                   | 0.0                   |
| SAN FLORIANO DEL COLLIO    | 41.1              | 0.3                   | 2.2                   |
| SAN LORENZO ISONTINO       | 0.0               | 0.0                   | 0.0                   |
| SAN PIER D'ISONZO          | 0.0               | 0.0                   | 0.0                   |
| SAVOGNA D'ISONZO           | 0.0               | 0.0                   | 0.0                   |
| STARANZANO                 | 0.0               | 0.0                   | 0.0                   |
| TURRIACO                   | 0.0               | 0.0                   | 0.0                   |
| VILLESSE                   | 256.9             | 0.7                   | 13.5                  |
| <b>ENTIRE STUDY AREA</b>   | <b>1898.9</b>     | <b>0.2</b>            | <b>100.0</b>          |

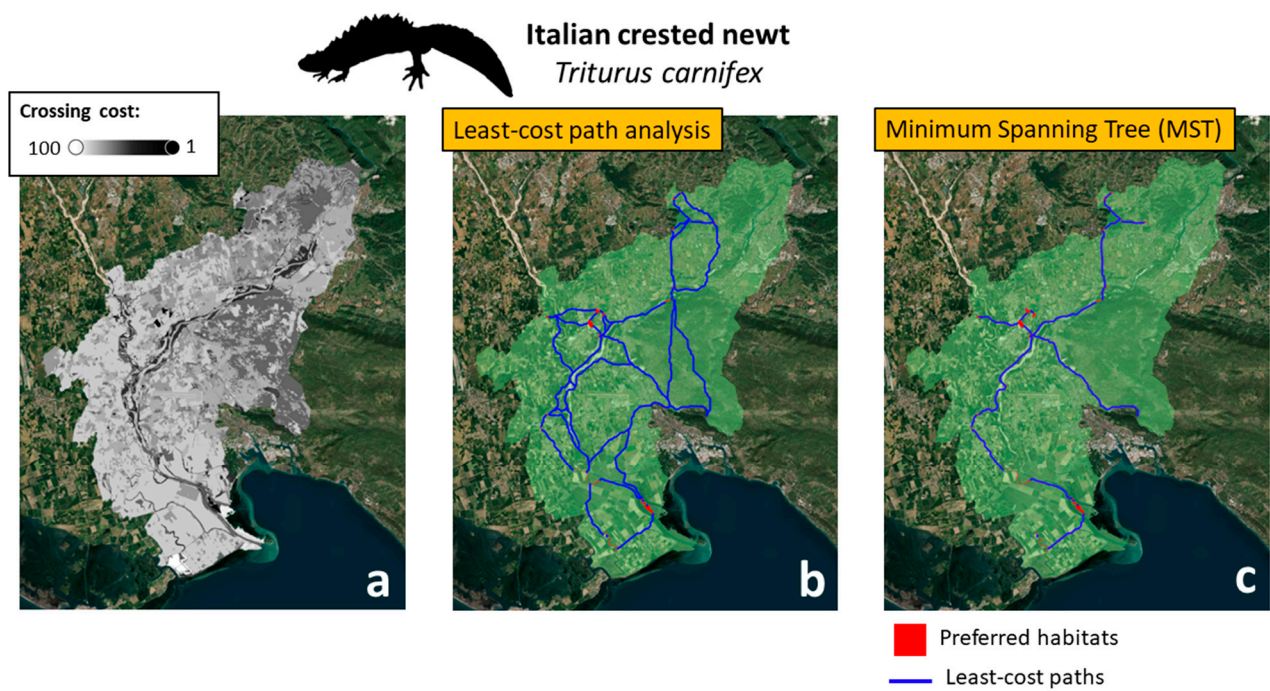

**Figure S1.** Generation of the Minimum Spanning Tree (MST) for one of the focus animal species, the Italian crested newt: a) Assignment of crossing costs to the mapped habitat types; b) Graph resulting from least-cost path analysis; c) MST connecting all nodes while minimizing crossing cost.

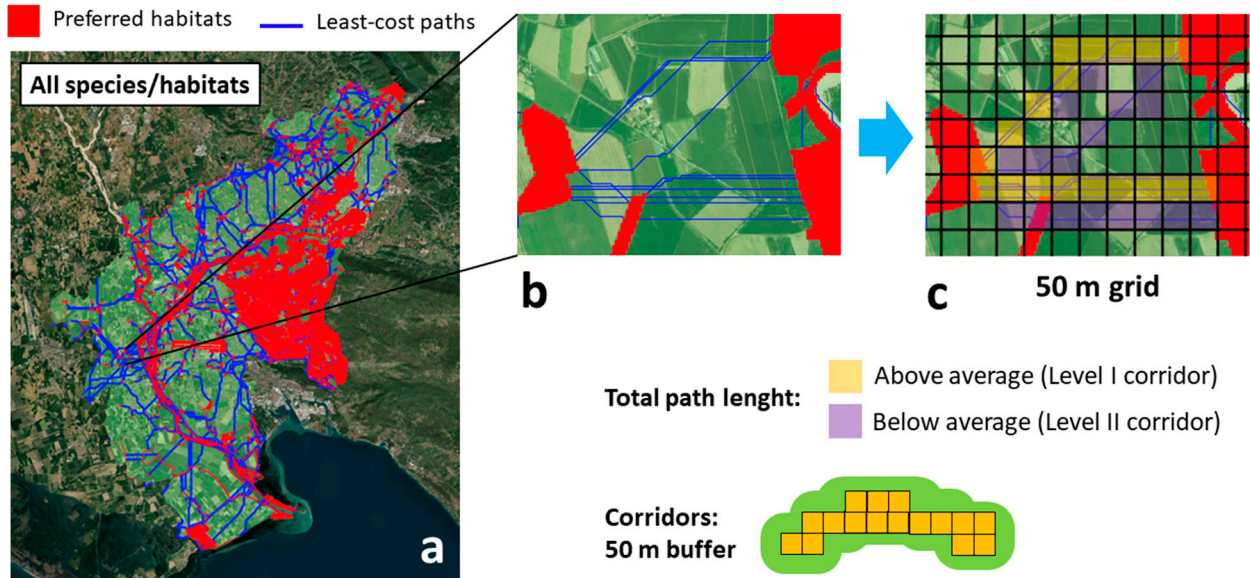

**Figure S2.** Mapping of corridors for the ecological network: a) The MST of all focal animal species and plant habitats are merged; b) Detail of the resulting graph; c) A 50 x 50 m grid was overlapped to the MST links, and only cells crossed by at least one link were selected. The link length index (TLL), as sum of all the length of links in each cell, was calculated. Cells showing TLL above the average value of the study area were deemed part of Level I corridors, while cells encompassing a below-average total link length were considered as Level II corridors. A buffer of 50 m was then applied to the cells, generating corridors with a minimum width of 150 m.
